# Supplementary material for: Characterization and Comparison of WO3/WO3-MoO3 and TiO2/TiO2-ZnO Nanostructures for Photoelectrocatalytic Degradation of the Pesticide Imazalil
Source: MDPI journal article supplement (doi:10.3390/nano13182584), 2023-09-18
Supplement: s1 [file s1]

# Characterization and Comparison of WO<sub>3</sub>/WO<sub>3</sub>-MoO<sub>3</sub> and TiO<sub>2</sub>/TiO<sub>2</sub>-ZnO Nanostructures for Photoelectrocatalytic Degradation of the Pesticide Imazalil

Mireia Cifre-Herrando, Gemma Roselló-Márquez, Pedro José Navarro-Gázquez, María José Muñoz-Portero, Encarnación Blasco-Tamarit and José García-Antón \*

Ingeniería Electroquímica y Corrosión (IEC), Instituto Universitario de Seguridad Industrial, Radiofísica y Medioambiental (ISIRYM), Universitat Politècnica de València, C/Camino de Vera s/n, 46022 Valencia, Spain

\* Correspondence: jgarciaa@iqn.upv.es

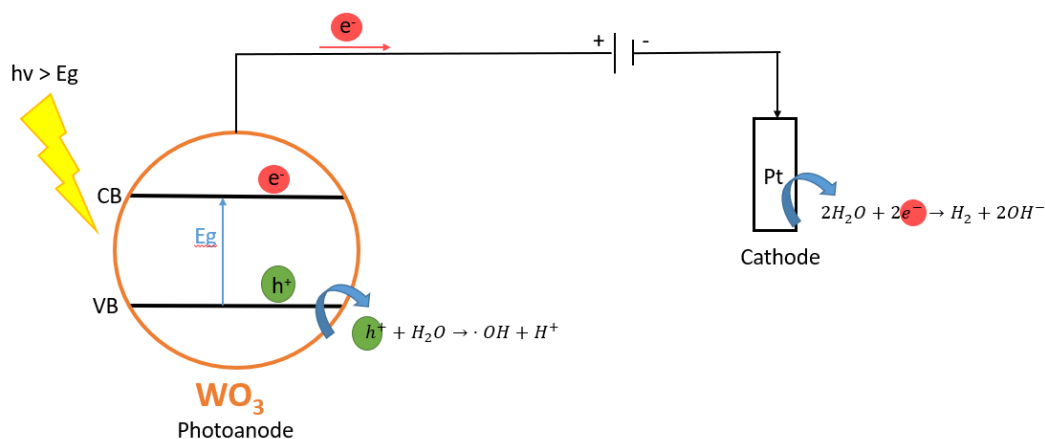

**Figure S1.** Scheme of PEC mechanism.

**Table S1.** Average crystal size, expressed as D (nm), for the different studied samples: WO<sub>3</sub>, WO<sub>3</sub>-Mo, TiO<sub>2</sub> and TiO<sub>2</sub>-ZnO.

| Sample                | Peak              |       | D (nm) |
|-----------------------|-------------------|-------|--------|
|                       | Associated to     | Plane |        |
| WO <sub>3</sub> -     | WO <sub>3</sub> - | 020   | 43.3   |
| WO <sub>3</sub> -Mo   | MoO <sub>3</sub>  | 110   | 43.2   |
|                       | WO <sub>3</sub>   | 020   | 40.4   |
| TiO <sub>2</sub>      | TiO <sub>2</sub>  | 101   | 26.2   |
| TiO <sub>2</sub> -ZnO | TiO <sub>2</sub>  | 101   | 25.5   |
|                       | ZnO               | 101   | 44.2   |

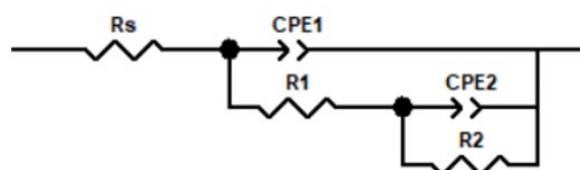

**Figure S2.** Equivalent circuit for the nanostructures synthesized.

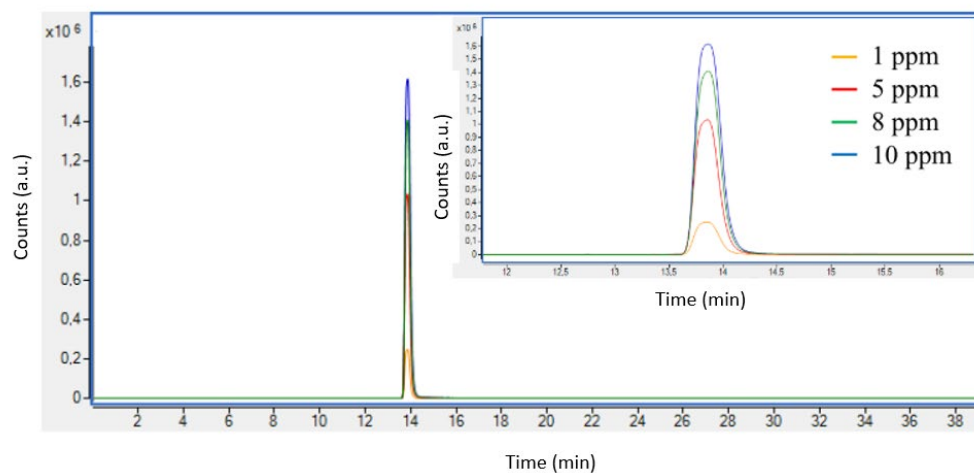

**Figure S3.** EIC chromatogram for the Imazalil standards in 0.1 M NaOH and inset of the magnification of the peak.

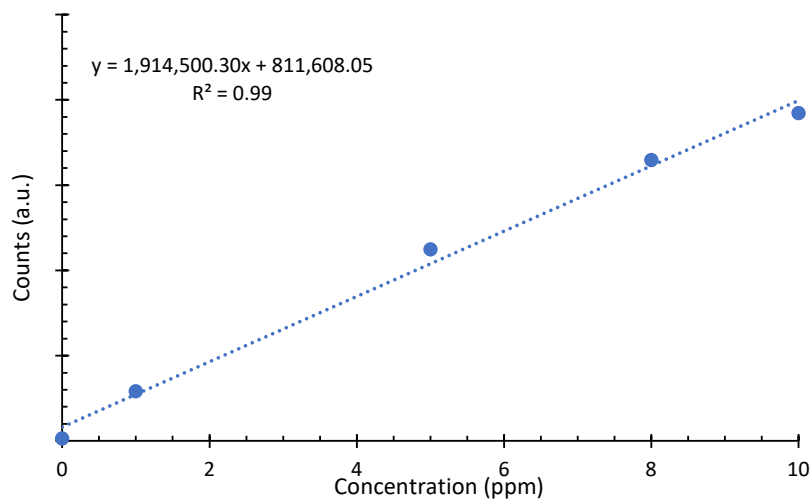

**Figure S4.** Calibration line for Imazalil standards in 0.1 M NaOH solution obtained with UHPLC-MS-QTOF.

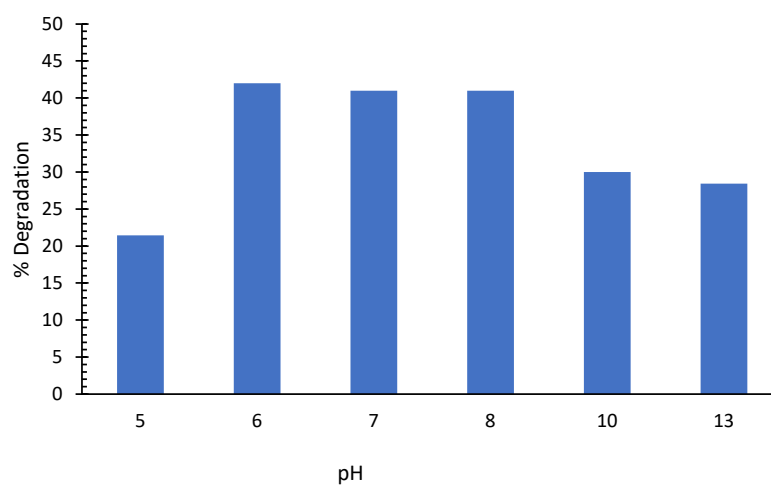

**Figure S5.** Influence of pH on the percentage of PEC degradation of Imazalil.

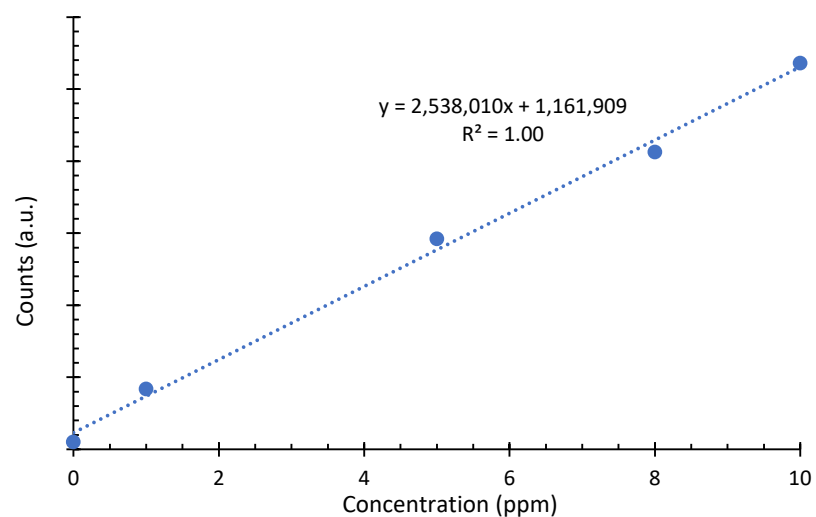

**Figure S6.** Calibration line for Imazalil standards in 0.1 M Na<sub>2</sub>SO<sub>4</sub> solution obtained with UHPLC-MS-QTOF.

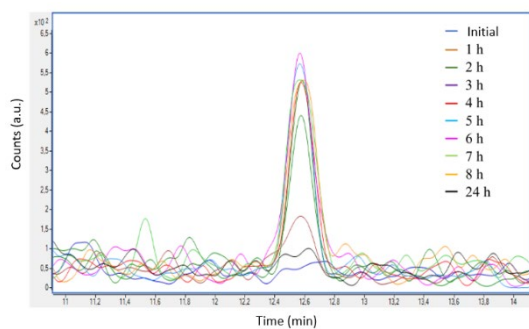

(a)

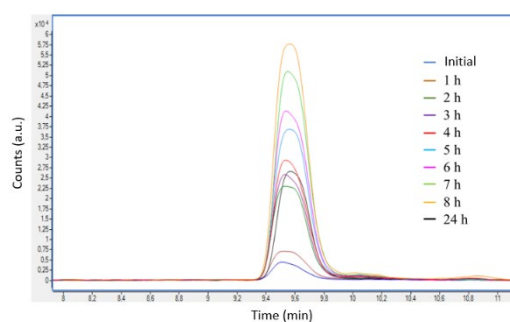

(b)

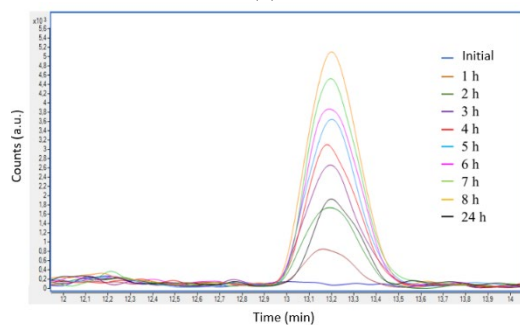

(c)

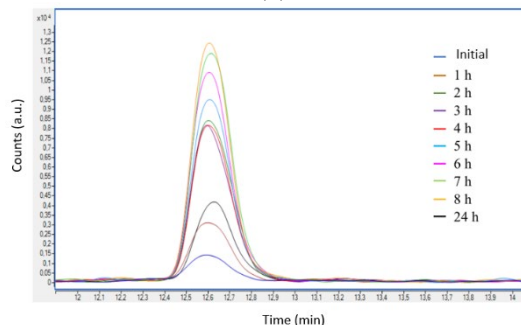

(d)

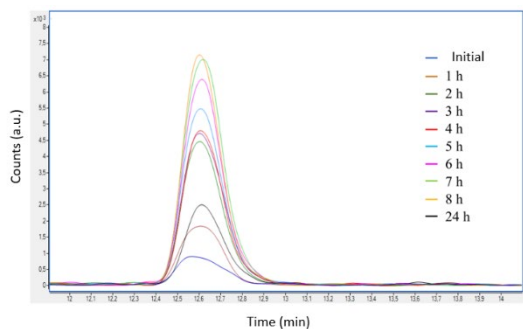

(e)

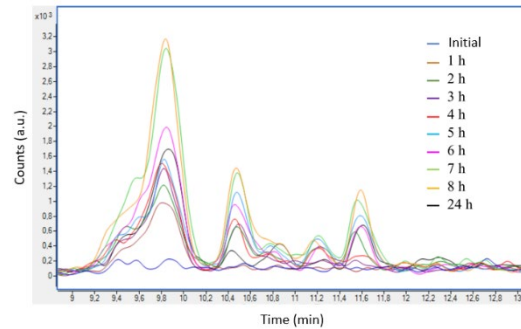

(f)

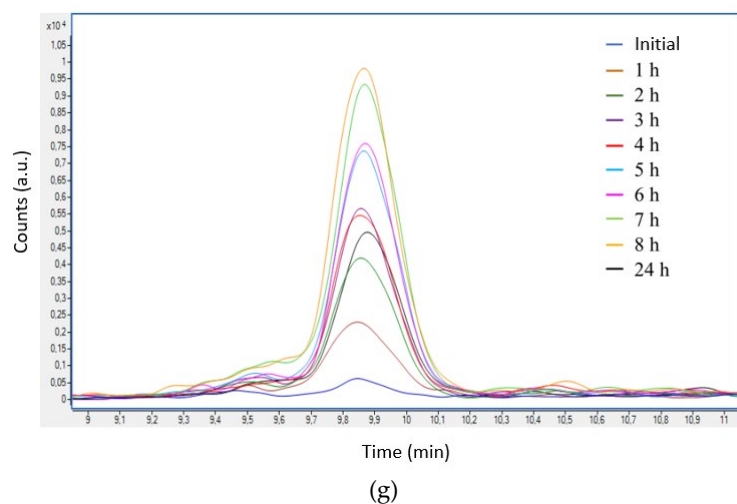

**Figure S7.** EIC chromatograms for (a) Intermediate 1,  $m/z = 246.05$  (b) Intermediate 2  $m/z = 257.02$  (c) Intermediate 3,  $m/z = 273.06$  (d) Intermediate 4,  $m/z = 311.04$  (e) Intermediate 5,  $m/z = 313.03$  (f) Intermediate 6,  $m/z = 329.04$  and (g) Intermediate 7,  $m/z = 331.06$  obtained during the PEC degradation of Imazalil in 0.1 M  $\text{Na}_2\text{SO}_4$  using the hybrid  $\text{TiO}_2\text{-ZnO}$  nanostructure as photoanode.
